# Supplementary material for: Early autoimmunity and outcome in virus encephalitis: a retrospective study based on tissue-based assay
Source: PubMed Central journal article supplement — J Neurol Neurosurg Psychiatry. 2023 May 24;94(8):605–13. doi: 10.1136/jnnp-2022-330626 (PMC10359542; doi:10.1136/jnnp-2022-330626), 2023-05-24
Supplement: jnnp-2022-330626supp001.pdf [file jnnp-2022-330626supp001.pdf]

## **Supplementary figure 1 The neuronal/glia autoantibody pattern by**

### **TBA**

a-d: All were defined as negative TBA. a: None of positive signal. b: Nonspecific fluorescence only occur in dura mater. c: Nonspecific antinuclear antibody bind to all the cell nuclear; d: Choroid plexus staining. A-H: All were defined as positive TBA. A: GFAP-IgG bind to glial filament in cerebellum molecular layer (the same location of slice to Figure a); B: GFAP-IgG bind to glial filament in cerebellum molecular layer (the same location of slice to Figure b); C: Neuronal staining in granular layer and molecular layer; D: Purkinje cells staining include the cell body and dendrite; E: IgG mainly binds to neuronal plasma membrane of the molecular layer; F: Immunostaining peri-Purkinje cell regions and white matter was intense; G: White matter tracts were clearly stained; H: Astrocyte staining but negative to GFAP indicating other antigens. I:ve serum samples
