# Supplementary figures and images for: Early autoimmunity and outcome in virus encephalitis: a retrospective study based on tissue-based assay
Source: PubMed Central journal article supplement — J Neurol Neurosurg Psychiatry. 2023 May 24;94(8):605–13. doi: 10.1136/jnnp-2022-330626 (PMC10359542; doi:10.1136/jnnp-2022-330626), 2023-05-24

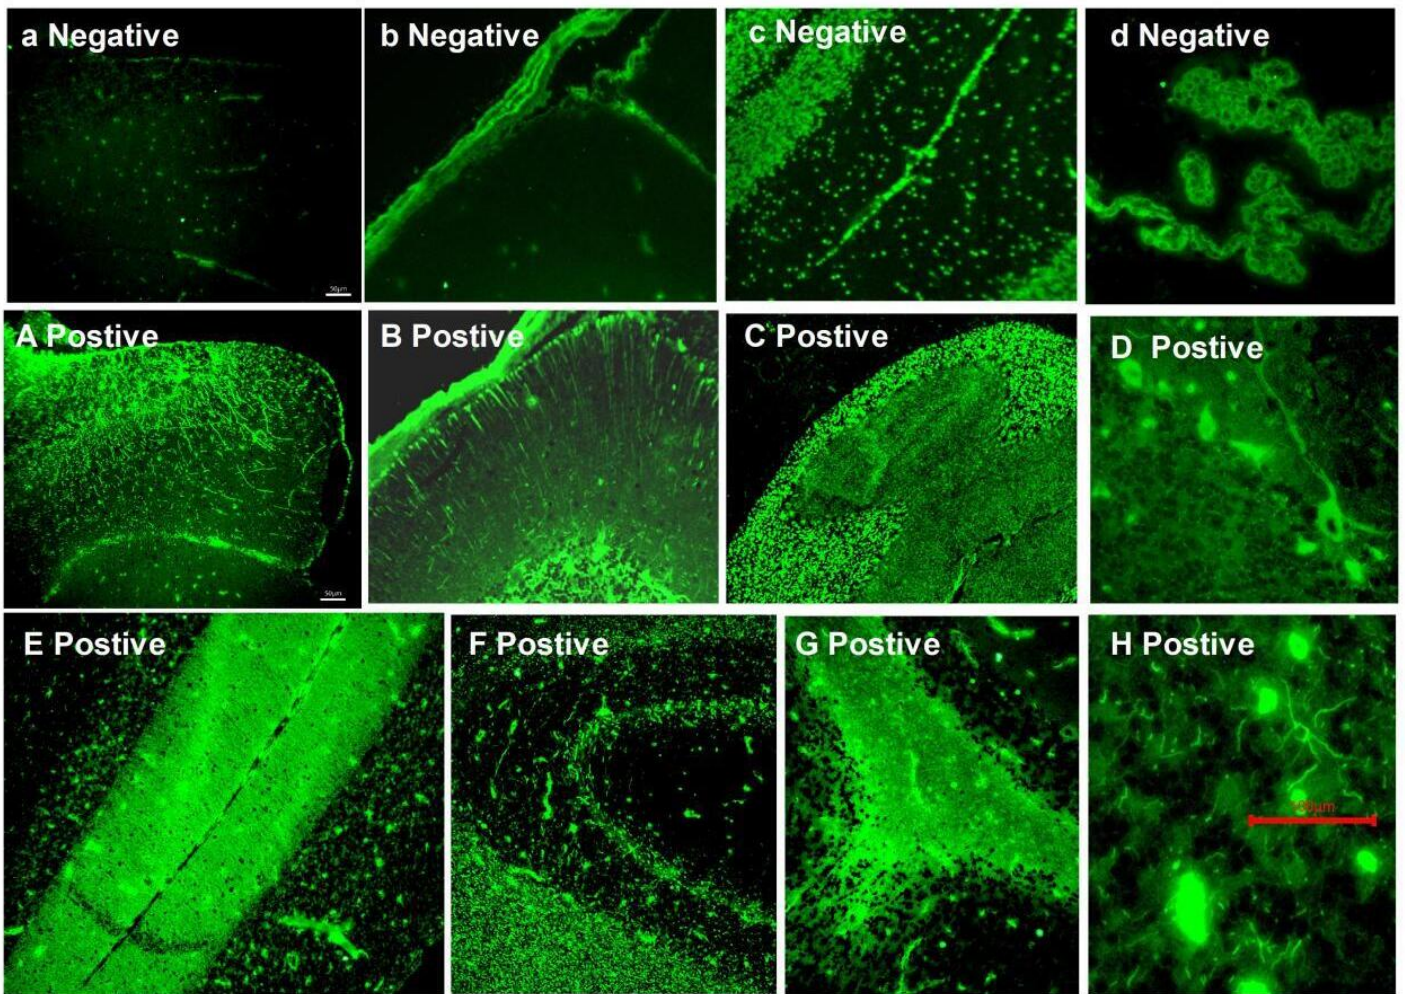

Supplement: jnnp-2022-330626supp002.pdf [file jnnp-2022-330626supp002.pdf]
